# Supplementary material for: Superhydrophobic fibers from cigarette filters for oil spill cleanup
Source: Royal Society of Chemistry journal article supplement (doi:10.1039/c6ra01303a), 2016-01-01
Supplement: c6ra01303a1.pdf [file c6ra01303a1.pdf]

**Electronic Supplementary Information for “Superhydrophobic fibers  
from cigarette filters for oil spill cleanup”**

*Junfei Ou,<sup>\* a,b</sup> Beibei Wan,<sup>a,b</sup> Fajun Wang,<sup>a,b</sup> Mingshan Xue,<sup>a,b</sup> Huiming Wu<sup>c</sup>, Wen Li,<sup>a,b</sup>*

*<sup>a</sup>School of Materials Science and Engineering, Nanchang Hangkong University, Nanchang 330063, P.*

*R. China*

*<sup>b</sup>Key Laboratory for Microstructural Control of Metallic Materials of Jiangxi Province, Nanchang*

*Hangkong University, Nanchang 330063, P. R. China*

*<sup>c</sup>College of Chemistry & Chemical Engineering, Hubei University, Wuhan 430062, P. R. China*

*<sup>d</sup>Department of Mechanical Engineering, Lassonde School of Engineering, York University, Toronto,*

*Canada*

---

To whom correspondence should be addressed.

Tel.: +86-971-6453210; fax: +86-971-6453210.

E-mail: oujunfei\_1982@163.com

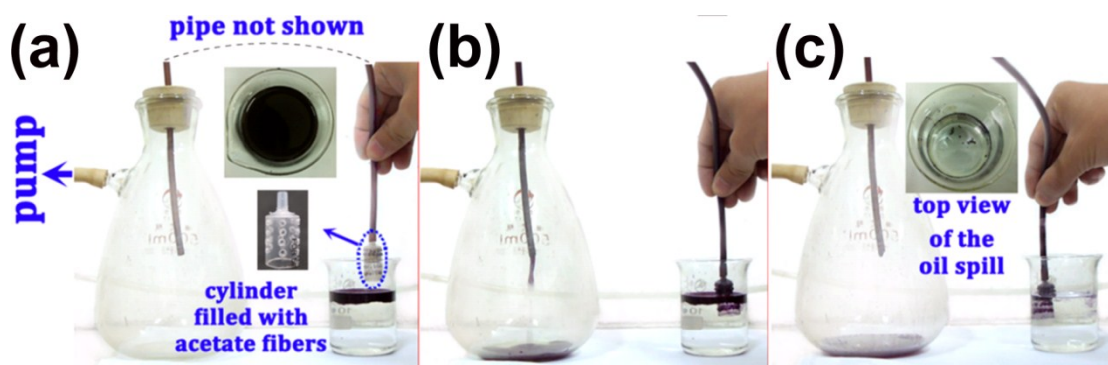

Fig. S1. The installation and process for oil spill cleanup by using the superhydrophobic fibers from cigarette filters

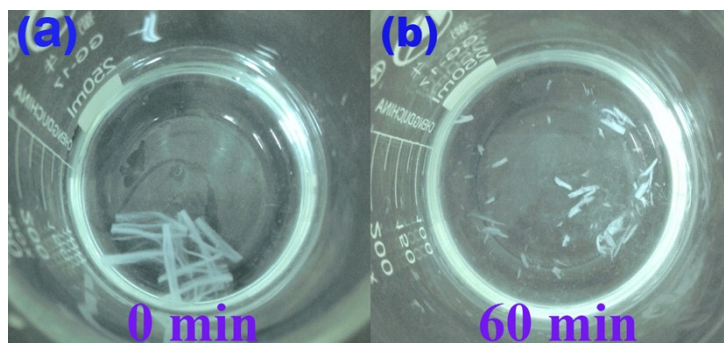

Fig. S2. The cellulose acetate fiber from cigarette butt immersed into the NaOH aqueous solution for 0 and 60 min
